# Supplementary material for: A Turn-On Lipid Droplet-Targeted Near-Infrared Fluorescent Probe with a Large Stokes Shift for Detection of Intracellular Carboxylesterases and Cell Viability Imaging
Source: MDPI journal article supplement (doi:10.3390/molecules28052317), 2023-03-02
Supplement: s1 [file s1]

***Electronic Supplementary Information (ESI)***

**A Turn-on Lipid Droplet-targeted Near-infrared  
Fluorescent**

**Probe with a Large Stokes Shift for Detection of  
Intracellular**

**Carboxylesterases and Cell Viability Imaging**

Chenglin Li <sup>†</sup>, Sifan Li <sup>†</sup>, Xinsheng Li, Tao Yuan, Jialei Xu, Xixin Gu and Jianli Hua <sup>\*</sup>

Key Laboratory for Advanced Materials, Joint International Research Laboratory for Precision  
Chemistry and Molecular Engineering, School of Chemistry and Molecular Engineering, East China  
University of Science and Technology, 130 Meilong Road, Shanghai 200237, China

<sup>\*</sup> Correspondence: jlhua@ecust.edu.cn

<sup>†</sup> These authors contributed equally to this work.

## Table of Contents

| Section      | Title                                                                            | Pages  |
|--------------|----------------------------------------------------------------------------------|--------|
| Figure S1    | Fluorescence and absorption spectra of <b>DBPpy</b> in different solvents        | S3     |
| Figure S2    | Fluorescence spectra of <b>DBPpys</b> after different times of reaction with CEs | S3     |
| Figure S3    | Stability testing                                                                | S4     |
| Figure S4    | pKa testing                                                                      | S4     |
| Figure S5    | Cytotoxicity testing                                                             | S5     |
| Figure S6    | CLSM of DPBpys after coincubation with HeLa cells after AEBSF pretreatment       | S5     |
| Figure S7    | Average fluorescence intensity of cells on CLSM                                  | S6     |
| Figure S8    | Oil-water distribution experiment of <b>DBPpy</b>                                | S6     |
| Section S1   | Synthesis and characterization                                                   | S7     |
| Scheme S1    | Synthetic route to the target compound <b>DBPpys</b>                             | S7-S9  |
| Figure S9-17 | NMR and HRMS spectra                                                             | S9-S13 |
| References   |                                                                                  | S14    |

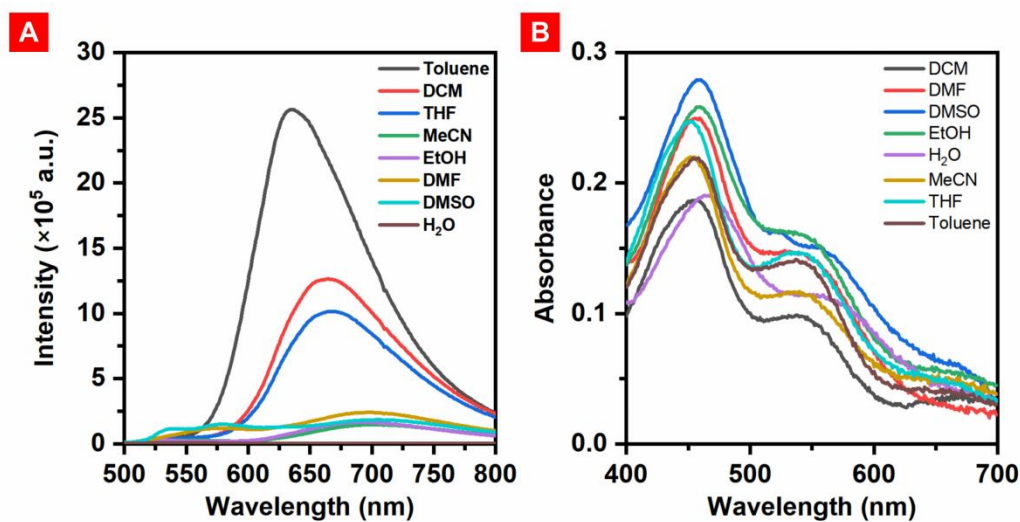

**Figure S1.** (A) Fluorescence spectra of **DBPpy** in different solvents. (B) Absorption spectra of **DBPpy** in different solvents.

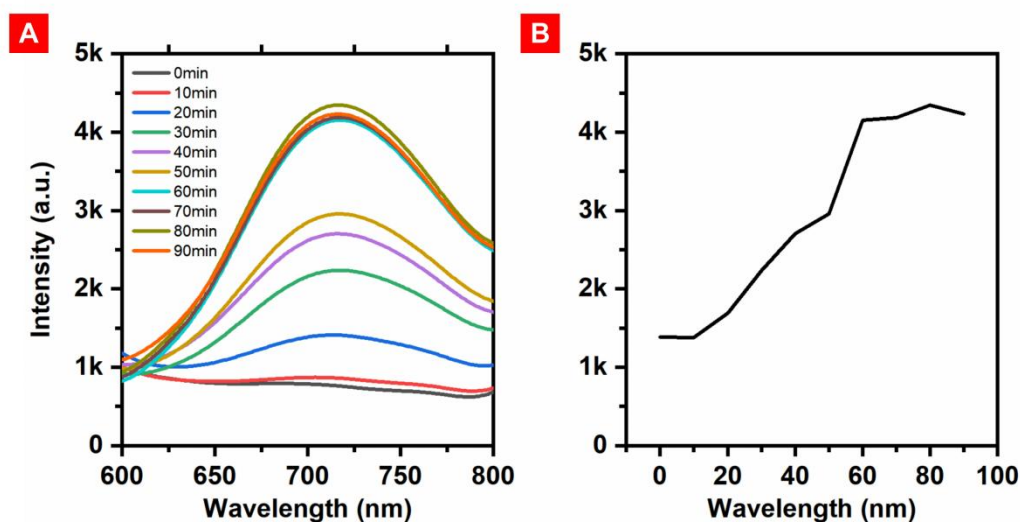

**Figure S2.** (A) Fluorescence spectra of **DBPpys** after different reaction times with CEs (10  $\mu$ M) in DMF:HEPES (v:v = 4:6, pH = 7.4). (B) The fluorescence intensity of **DBPpys** (10  $\mu$ M) at 720 nm after different reaction times with CEs in DMF:HEPES (v:v = 4:6, pH = 7.4).

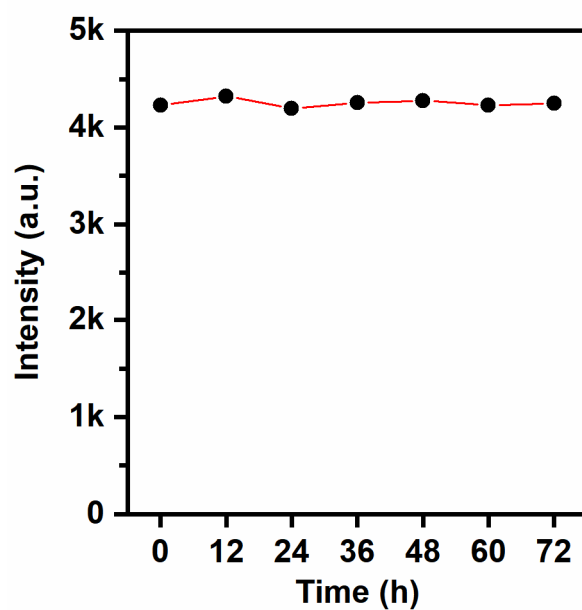

**Figure S3.** The plot of peak intensity of **DBPpy** (10  $\mu$ M) at 720 nm in DMF : Cell Lysate (v : v = 4 : 6) at different time points.

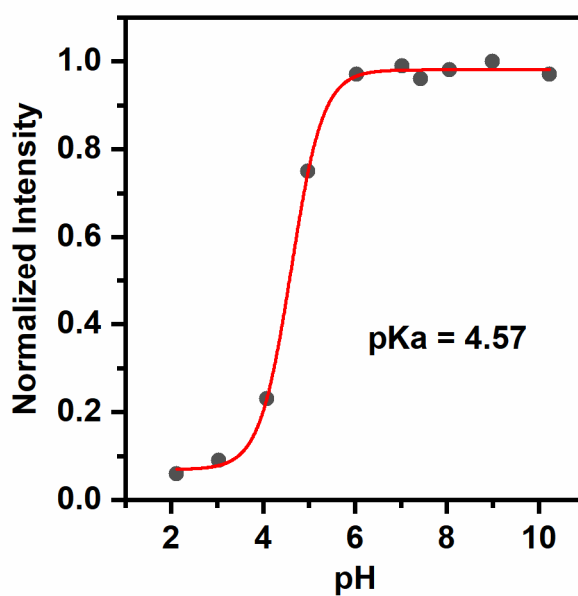

**Figure S4.** pH-dependent fluorescence intensity of **DBPpy** (10  $\mu$ M in DMF : HEPES (v : v = 4 : 6) for various pH, monitored at 720 nm).

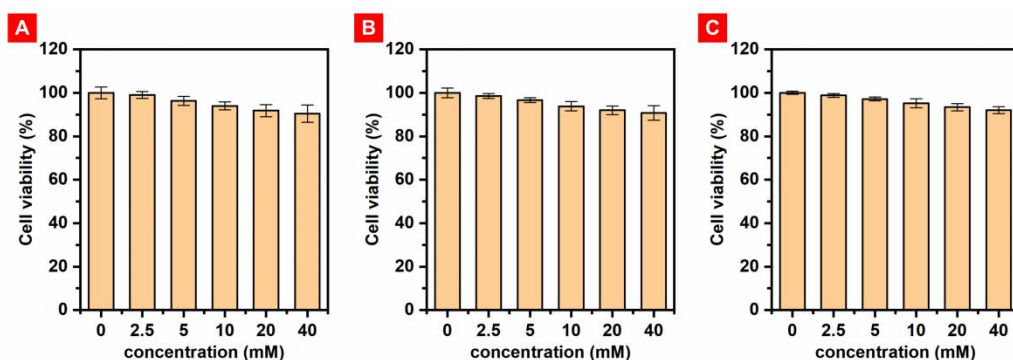

**Figure S5.** The viability of HeLa Cells after 24h of DBPpys (A), DBPpy (B) and AEBSF (C) treatment in the dark.

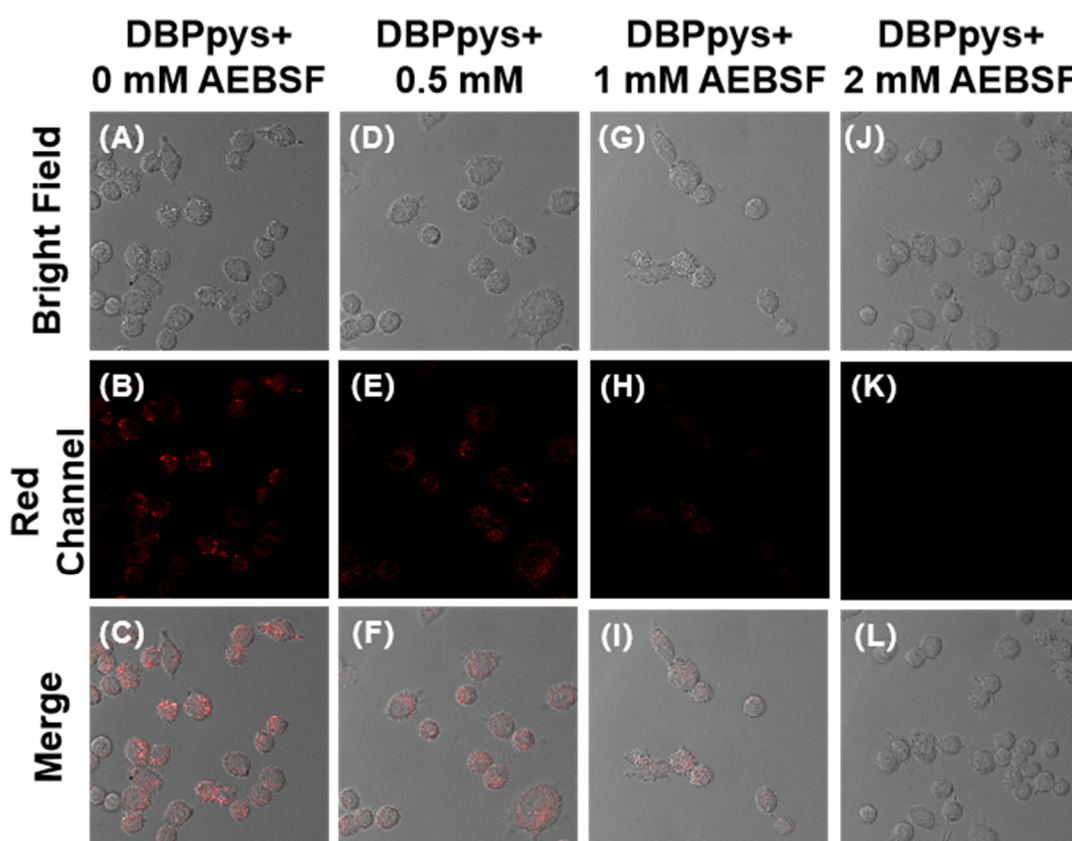

**Figure S6.** Fluorescent imaging of HeLa cells stained with 10  $\mu$ M DBPpys after different AEBSF concentrations pretreatment. AEBSF concentration: (A-C) 0 mM; (D-F) 0.5 mM; (G-I) 1 mM; (J-L) 2 mM. (A, D, G, J) bright field; (B, E, H, K) red channel (650-750 nm); (C, F, I, L) merge image.  $\lambda_{\text{ex}} = 550$  nm. Scale bar = 10  $\mu$ m.

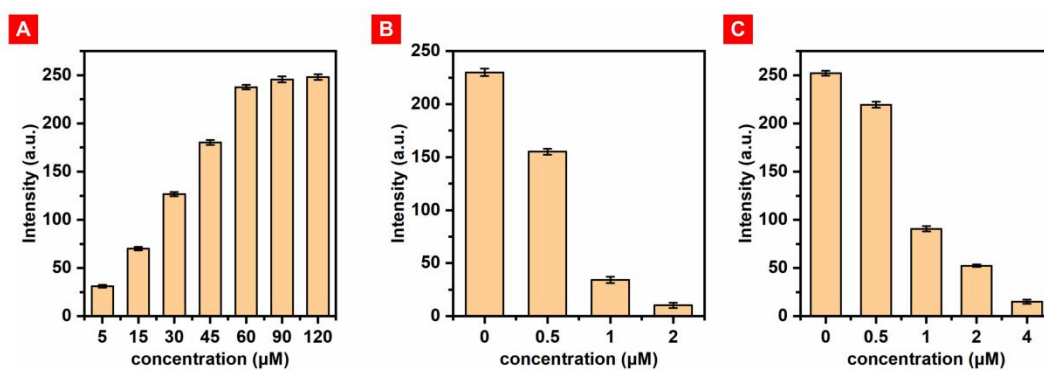

**Figure S7.** Average fluorescence intensity of HeLa cells (A) stained with 10  $\mu\text{M}$  DBPpys with different incubation times; (B) stained with 10  $\mu\text{M}$  DBPpys after different AEBSF concentrations pretreatment; (C) stained with 10  $\mu\text{M}$  DBPpys after different  $\text{H}_2\text{O}_2$  concentrations pretreatment.

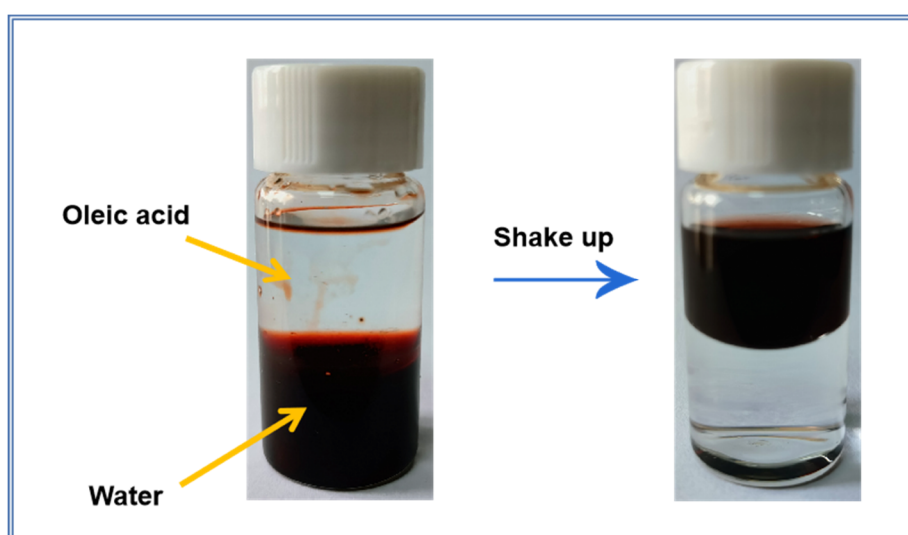

**Figure S8.** Photographs of DBPpy in aqueous media before (left) and after (right) shaking with oleic acid at 37.4°C for 1h.

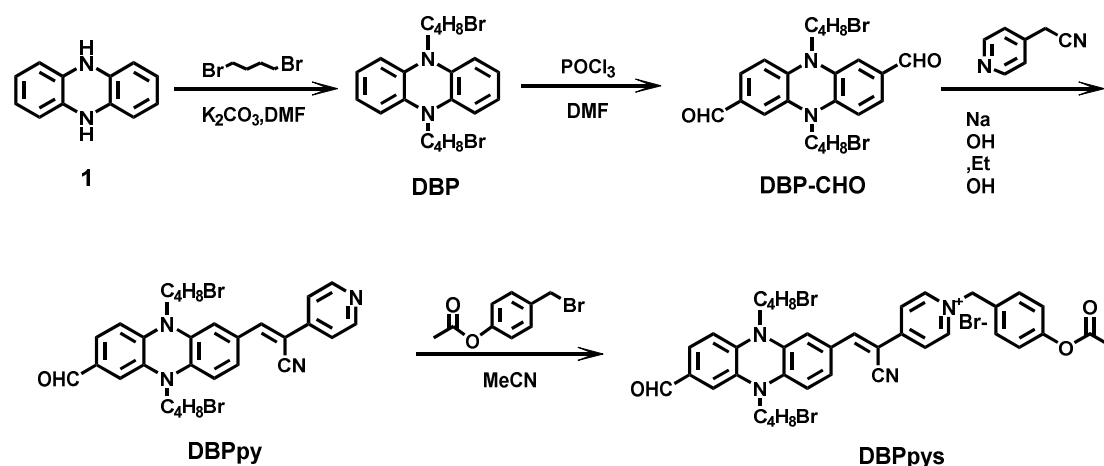

**Scheme S1.** Synthetic route to the target compound **DBPpys**.

### Synthesis of compound **DBP**.

Compound **1** was prepared through literature reported methods [1-2]. Compound **1** (7.02 g, 36 mmol),  $K_2CO_3$  (7.28 g, 52 mmol) was put into 30 mL DMF, the mixture was heated to 110 °C under argon atmosphere. After stirring for 1 hour, the 1,4-dibromobutane (12 mL, 10 mmol) was added into reaction, then the mixture was stirred for 6 hours. After cooling to room temperature, solvent was removed under vacuum. The crude product was purified by neutral aluminum oxide chromatography, using petroleum ether / dichloromethane (1:1, v/v) as eluent to isolate pure compound **3** (8.2 g, 50.6%) as a green solid. On account of the extreme instability of the product, it was not characterized and quickly put into the next reaction.

### Synthesis of **DBP-CHO**.

Compound **DBP** (5.1g, 9.1 mmol) were dissolved in DMF (15 mL), then added phosphorus oxychloride (2 mL, 21.8 mmol) dropwise under an ice bath with stirring. After addition, it was stirred for 10 minutes and heated to reflux at 120 °C for 8 hours. After the reaction was completed, the mixed solution was cooled and poured into ice water, the pH was adjusted to 9-10 using aqueous NaOH solution. The reaction solution changed from dark red to orange-red and solid was precipitated, filtered and the crude product was then purified by silica gel chromatography using petroleum ether /

dichloromethane (1:5, v/v) as an eluent to isolate pure **DBP-CHO** (2.9 g, 63%) as a red solid.  $^1\text{H}$  NMR (400 MHz, DMSO- $d_6$ )  $\delta$  9.59 (s, 2H), 7.22 (dd,  $J$  = 8.3, 1.6 Hz, 2H), 6.74 (d,  $J$  = 1.7 Hz, 2H), 6.55 (d,  $J$  = 8.2 Hz, 2H), 3.74 (t,  $J$  = 6.5 Hz, 4H), 3.53 (t,  $J$  = 8.0 Hz, 4H), 1.89 (p,  $J$  = 6.8 Hz, 4H), 1.66 (p,  $J$  = 7.6, 7.1 Hz, 4H).  $^{13}\text{C}$  NMR (101 MHz, Chloroform- $d$ )  $\delta$  189.73, 130.18, 110.07, 108.37, 44.25, 30.20, 29.71, 29.47. HRMS (ESI-MS,  $m/z$ ): Calcd for  $[\text{M}+\text{H}]^+$ , 507.0283; Found, 507.0285.

### Synthesis of DBPpy.

**DBP-CHO** (300 mg, 0.56 mmol) and NaOH (24 mg, 0.6 mmol) were added to ethanol and this mixture was stirred and heated at 70 °C for 30 minutes under argon atmosphere. Subsequently, 4-pyridylacetonitrile (66 mg, 0.56 mmol) was added dropwise to the mixture. Then the reaction was quenched with water when its color became deep red. Finally, the product (201 mg, 54.9 %) was purified by silica gel chromatography using dichloromethane / ethyl acetate (5:1, v/v) as an eluent.  $^1\text{H}$  NMR (400 MHz, DMSO- $d_6$ )  $\delta$  9.60 (s, 1H), 8.64 (s, 2H), 8.00 (s, 1H), 7.65 (s, 2H), 7.24 (q,  $J$  = 7.1, 5.6 Hz, 3H), 6.75 (s, 1H), 6.58 (d,  $J$  = 8.3 Hz, 2H), 3.74 (q,  $J$  = 7.1 Hz, 4H), 3.53 (d,  $J$  = 8.2 Hz, 4H), 1.91 (m, 4H), 1.77-1.63 (m, 4H).  $^{13}\text{C}$  NMR (101 MHz, Methylene Chloride- $d_2$ )  $\delta$  189.90, 150.79, 144.12, 142.80, 142.64, 140.40, 135.48, 135.30, 130.86, 130.11, 129.91, 126.57, 119.75, 110.75, 110.52, 109.54, 108.67, 103.04, 46.32, 44.92, 29.87, 22.11. HRMS (ESI-MS,  $m/z$ ): Calcd for  $[\text{M}+\text{H}]^+$ , 607.0708; Found, 607.0710.

### Synthesis of DBPpys.

**DBPpy** (103 mg, 0.17 mmol) and 4-bromomethylphenyl acetate (46 mg 0.2 mmol) were added to acetonitrile and this mixture was stirred and heated at 80 °C for 12 hours under argon atmosphere. After removal of the solvent under vacuum, the crude product was purified by silica gel chromatography (dichloromethane / ethanol, 10/1, v/v) gave **DBPpys** (112 mg, 79 %) as a dark green solid.  $^1\text{H}$  NMR (400 MHz, DMSO- $d_6$ )  $\delta$  9.63 (s, 1H), 9.09 (d,  $J$  = 7.0 Hz, 2H), 8.34 (s, 1H), 8.27 (d,  $J$  = 6.9 Hz, 2H), 7.61 – 7.54 (m, 2H), 7.36 (dd,  $J$  = 8.8, 1.9 Hz, 1H), 7.32 – 7.27 (m, 2H), 7.24 – 7.20 (m, 2H), 6.92 –



6.84 (m, 1H), 6.70 – 6.55 (m, 2H), 5.77 (d,  $J = 4.1$  Hz, 2H), 3.63 (dt,  $J = 16.3, 6.5$  Hz, 4H), 3.53 (t,  $J = 8.5$  Hz, 4H), 2.27 (s, 3H), 1.92 (m, 4H), 1.69 (m, 4H).  $^{13}\text{C}$  NMR (101 MHz, DMSO- $d_6$ )  $\delta$  190.55, 169.60, 151.54, 151.27, 144.62, 142.50, 141.68, 135.15, 134.48, 132.54, 130.71, 130.48, 130.14, 126.14, 123.12, 122.93, 122.65, 120.74, 118.05, 116.16, 111.61, 97.62, 93.47, 61.55, 45.41, 31.61, 30.28, 29.43, 21.30. HRMS (ESI-MS,  $m/z$ ): Calcd for  $[\text{M}+\text{H}]^+$ , 755.1227; Found, 755.1229.

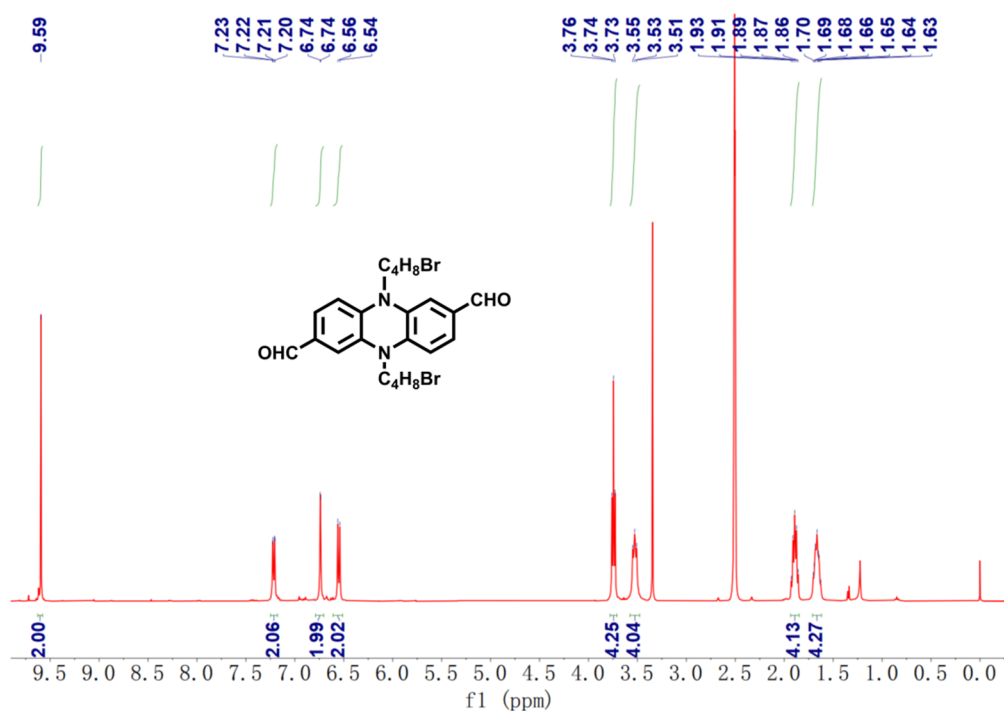

**Figure S9.**  $^1\text{H}$  NMR of DBP-CHO.

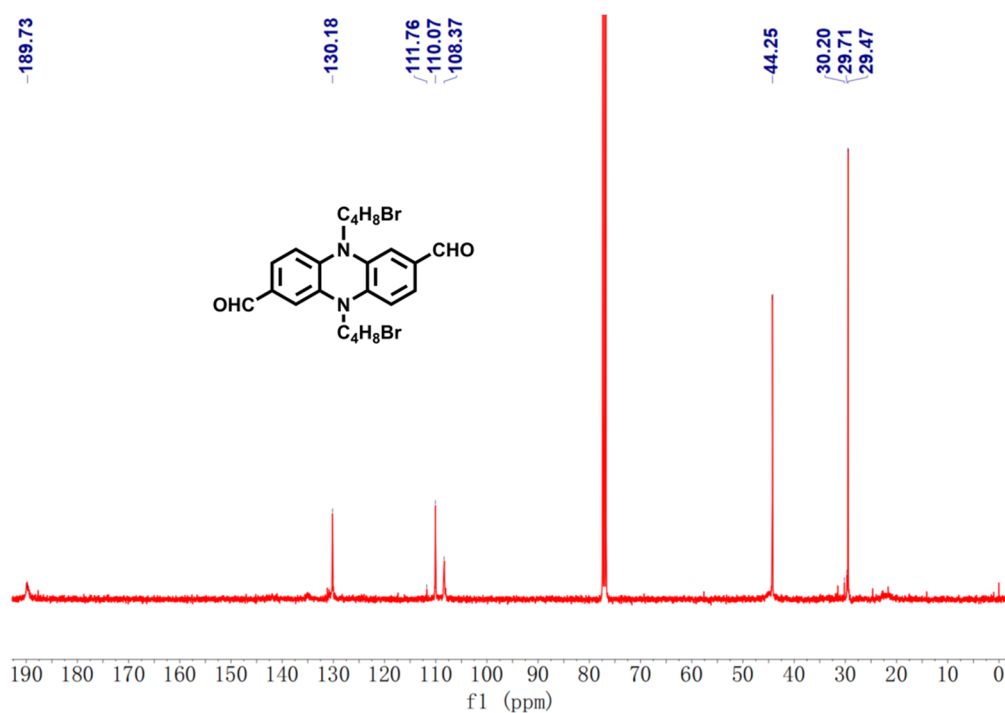

**Figure S10.**  $^{13}\text{C}$  NMR of DBP-CHO.

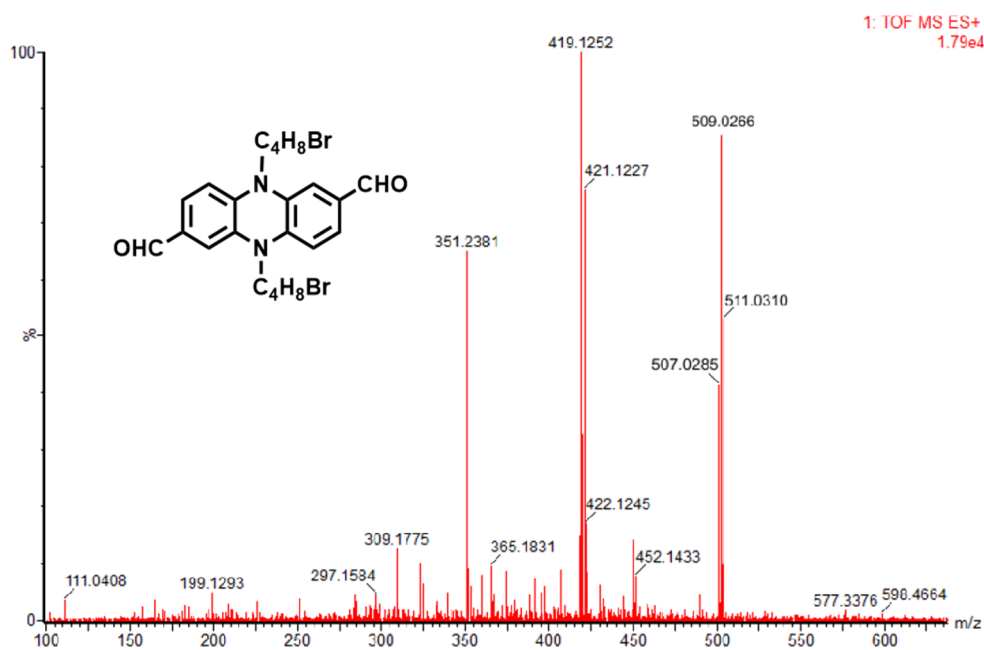

**Figure S11.** HRMS of DBP-CHO.

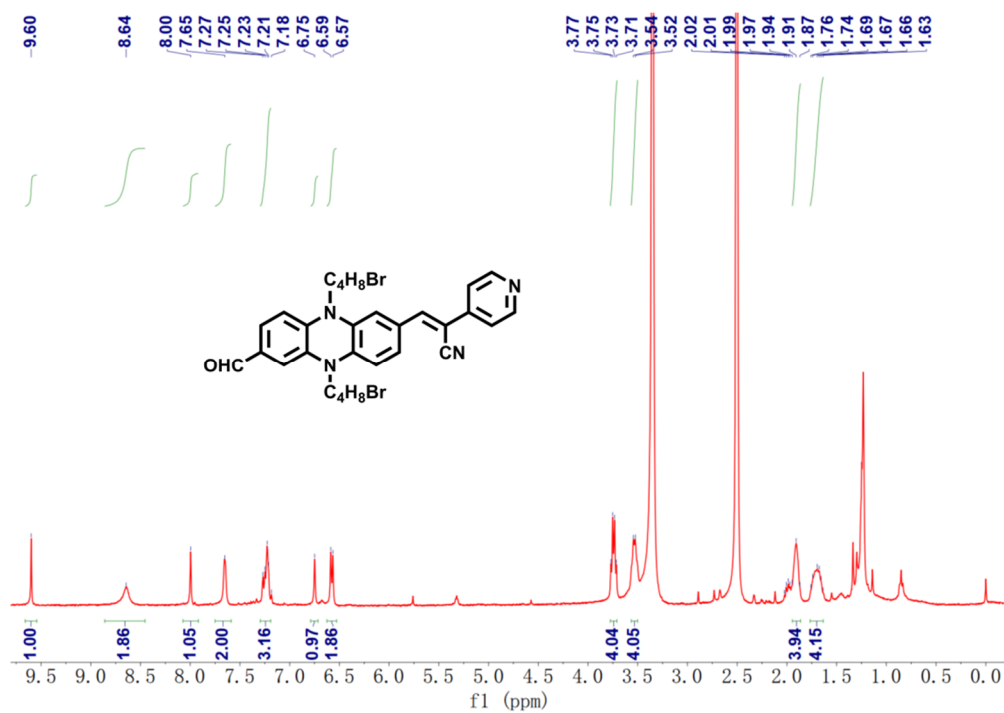

**Figure S12.** <sup>1</sup>H NMR of DBPpy.

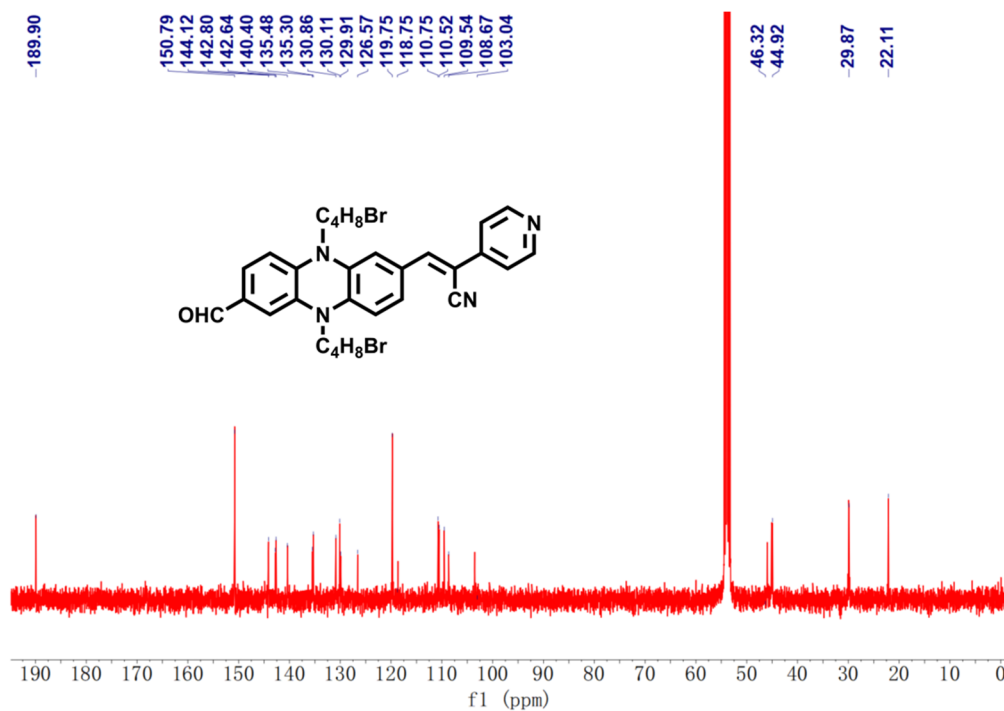

**Figure S13.** <sup>13</sup>C NMR of DBPpy.

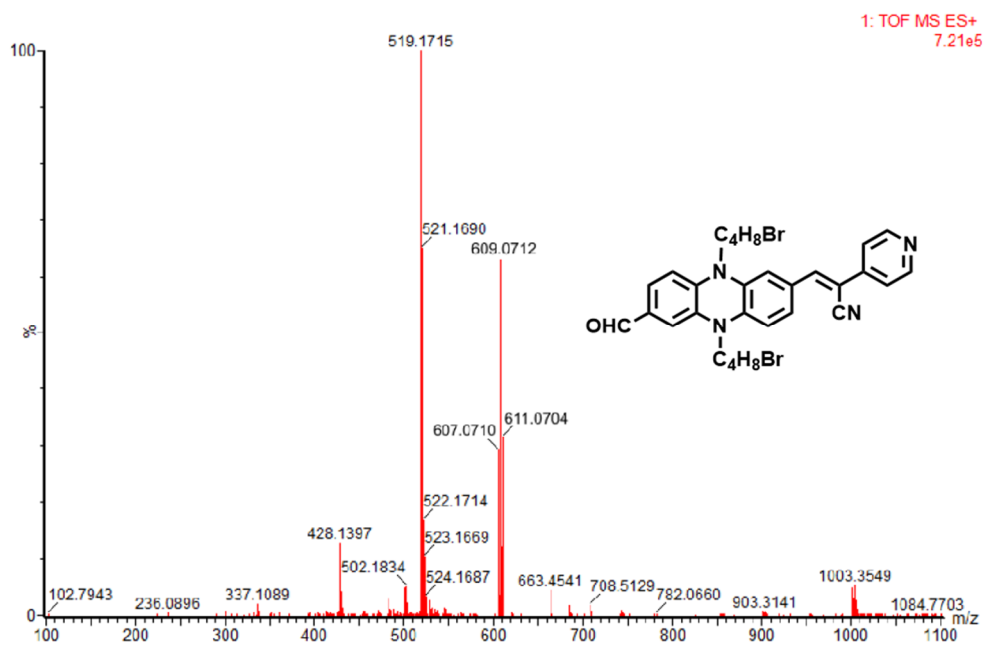

Figure S14. HRMS of DBPpy.

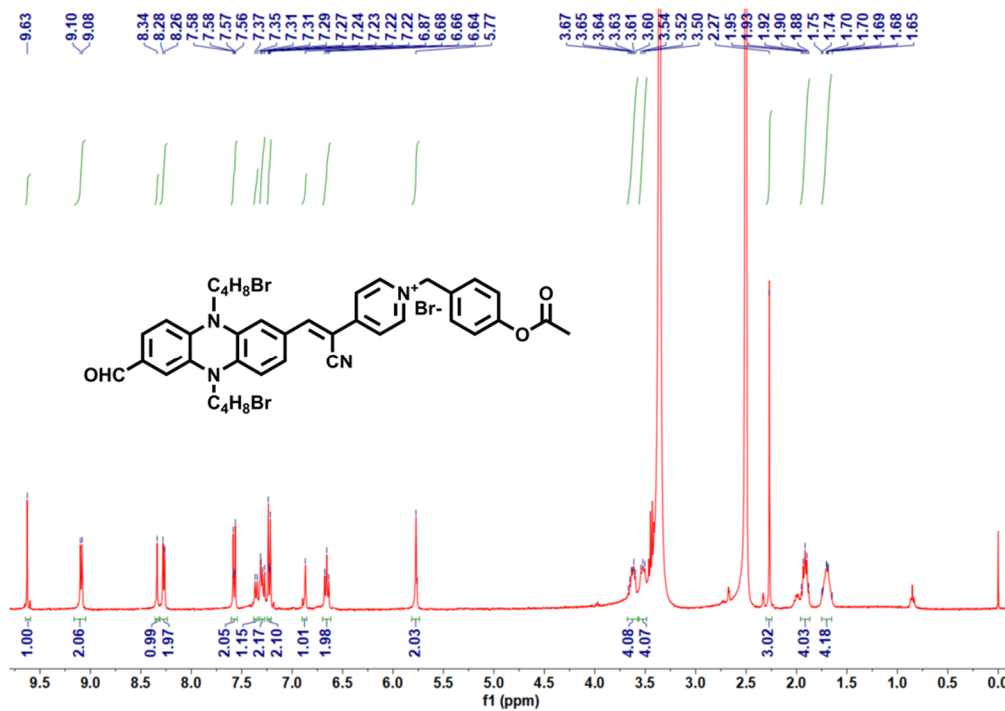

Figure S15.  $^1\text{H}$  NMR of DBPpy.

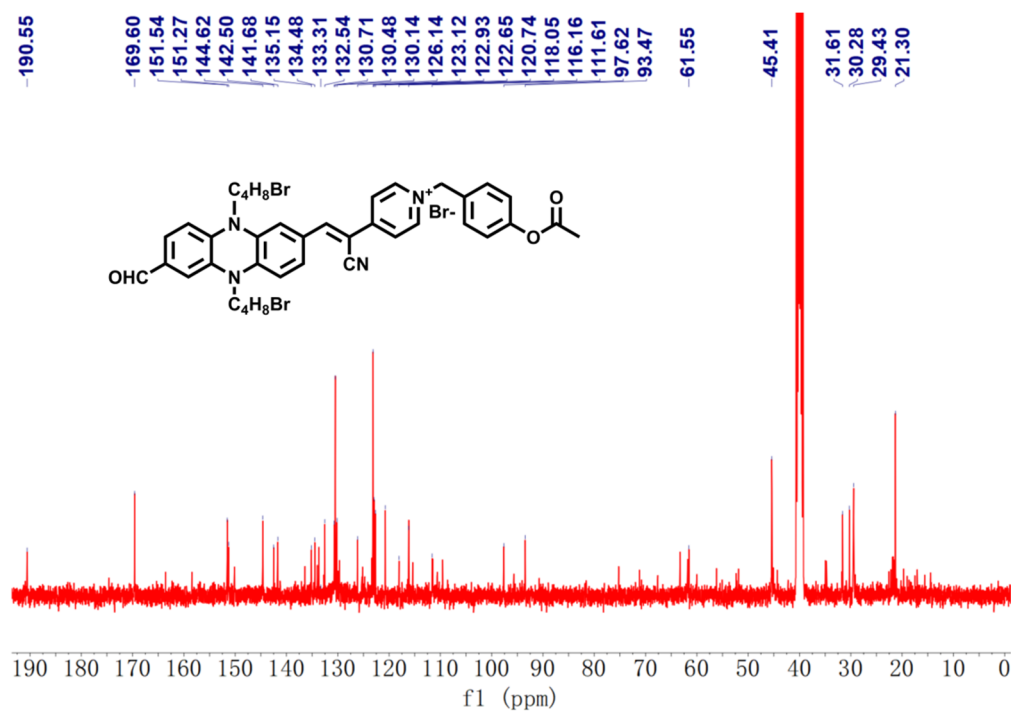

Figure S16.  $^{13}\text{C}$  NMR of DBPpys.

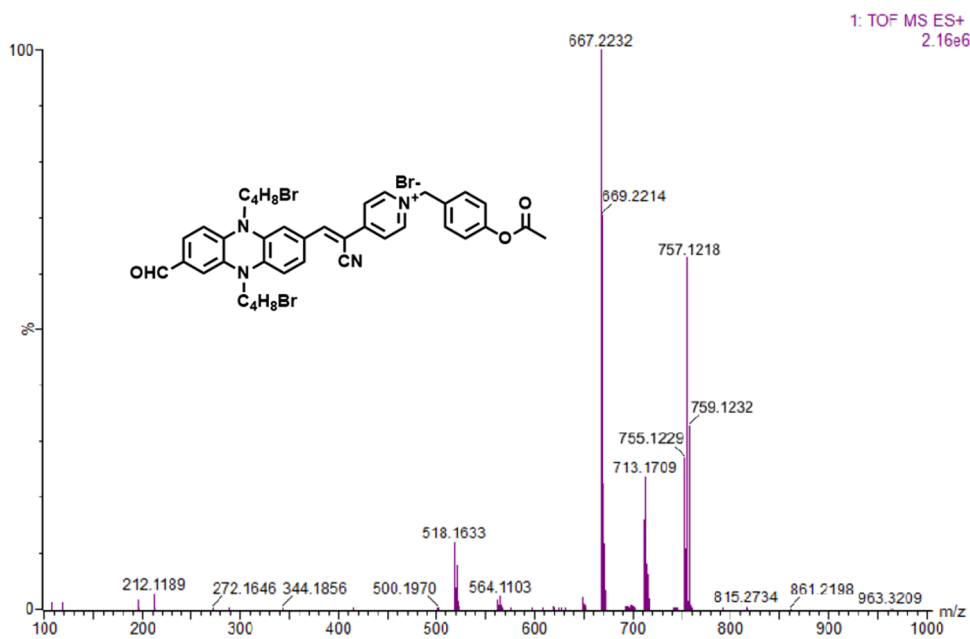

Figure S17. HRMS of DBPpys.

## References

- [1] Yang, L.; Li, X.; Yang, J.; Qu, Y.; Hua, J. Colorimetric and ratiometric near-infrared fluorescent cyanide chemodosimeter based on phenazine derivatives. *ACS Appl. Mater. Inter.* **2013**, *5*, 1317–1326.
- [2] Yan, Y.; Liu, L.; Li, C.; Yang, Z.; Yi, T.; Hua, J. A NIR fluorescent probe based on phenazine with a large Stokes shift for the detection and imaging of endogenous H<sub>2</sub>O<sub>2</sub> in RAW 264.7 cells. *Analyst* **2020**, *145*, 4196–4203.
